# Supplementary material for: ClRTL1 Encodes a Chinese Fir RNase III–Like Protein Involved in Regulating Shoot Branching
Source: Int J Mol Sci. 2015 Oct 26;16(10):25691–710. doi: 10.3390/ijms161025691 (PMC4632822; doi:10.3390/ijms161025691)
Supplement: Supplementary file 1 [file ijms-16-25691-s001.pdf]

# Supplementary Information

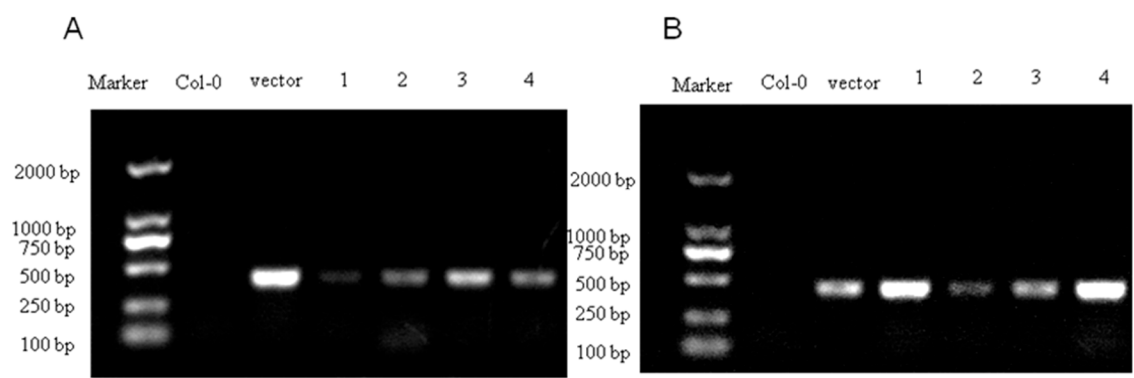

**Figure S1.** Confirmation of the integration of *ClRTL1* into *Arabidopsis thaliana* by PCR and RT-PCR. (A) PCR analysis of 35S: *ClRTL1* plants. Col-0: wild-type *Arabidopsis thaliana* (ecotype Columbia); vector: the plant expression vector CaMV35S-PBI121 *ClRTL1*; lanes 1–4: transformant T1 plants; (B) RT-PCR analysis of 35S: *ClRTL1* plants. Col-0: wild-type *Arabidopsis thaliana* (ecotype Columbia); vector: the plant expression vector CaMV35S-PBI121 *ClRTL1*; lanes 1–4: transformant T1 plants.

**Table S1.** Numbers of rosette leaves of Col-0 and 35S: *ClRTL1* *Arabidopsis*.

| Types of <i>Arabidopsis Thaliana</i> | Col-0 | Heterozygous 35S: <i>ClRTL1</i> | Homozygous 35S: <i>ClRTL1</i> |
|--------------------------------------|-------|---------------------------------|-------------------------------|
| Number of rosette leaves             | 7 ± 3 | 7 ± 6.1                         | 10 ± 3.5                      |
